# Supplementary material for: Dynamic silencing of somatic L1 retrotransposon insertions reflects the developmental and cellular contexts of their genomic integration
Source: PubMed Central journal article supplement (PMC5424313; doi:10.1186/s13100-017-0091-2), 2017-05-10
Supplement: 13100_2017_91_MOESM1_ESM.pdf [file 13100_2017_91_MOESM1_ESM.pdf]

## SUPPLEMENTARY INFORMATION – KANNAN ET AL.

### SUPPLEMENTARY FIGURES

Supp. Fig. S1. Schematic of beta-lactamase reporter assay. (A – C) As described by Zlokarnik et al. [43], a fluorescent substrate called CCF2-AM is taken up inside cells where it can be trapped by cytoplasmic esterases. Cleavage of the intracellular fluorescent substrate CCF2 is mediated by the reporter protein, beta-lactamase, which is encoded by the *TEM1* reporter gene. This cleavage of CCF2 changes its fluorescence emission from green to blue. The amount of blue emission correlates with beta-lactamase levels. From [43]. Reprinted with permission from AAAS. (D) Schematics of (*top*) full-length L1 donor with *TEM1*-AI reporter at 3' end, and (*bottom*) a hypothetical, newly inserted sequences mobilized by L1 retrotransposition in genomic DNA, including spliced *TEM1* reporter and target site duplications (TSD, red filled circles). At bottom, a truncated integrant lacking full-length *TEM1* reporter, so functional beta-lactamase is not expressed. Variable expression of beta-lactamase translated from the integrated *TEM1* gene (from low to high) in individual cells results in different CCF2 fluorescent emissions ranging from green to blue.

### Supp. Fig. S2. Schematics of newly integrated sequences retrotransposed by L1. (A-C)

Each insertion shows characteristics of bona fide L1 retrotransposition, including poly(A) tails at the 3' end, (A, C) target site duplications (TSDs) at the 5' and 3' ends, and in (B), an inversion. We recovered an intact reporter gene after splicing and integration (A), while the others had truncations at the 5' end (B, C). Chromosomal coordinates of the integration sites are shown.

### Supp. Fig. S3. Standardized blue and green cell populations as controls for flow

**cytometry analysis.** Green cells (untransfected cells stained with CCF2-AM) and blue cells (variegating cells treated with 100nM Trichostatin A for 24 hrs; cf. Fig. 3 and following) were used to set the gates for analysis of the variegated cell populations. We used a Becton-

Dickenson LSR II flow cytometer fitted with a 405nm violet laser and 440/40nm (blue) and 530/30nm (green) filters. Scatter plots of cells' fluorescence emissions are shown; blue/green ratios were calculated for each cell's fluorescence emissions.

Supp. Fig. S4. Dense maintenance methylation of pre-existing L1 retrotransposons in cultured human colorectal cancer (HCT116) cells is reduced dramatically in *DNMT1* and *DNMT3b* methyltransferase double knockout cells. *Top*: Schematic of pre-existing, full-length L1 integrants interspersed genome-wide, including open reading frame-1 (ORF1) and ORF2 (*yellow arrows*). *Black square, number 1*: position within the 5' L1 untranslated region (UTR; *green*), analyzed by bisulfite sequencing. Each circle represents a CpG dinucleotide. *Filled circles*: methylcytosine; *open circles*: unmethylated cytosines; *red fill*: not determined. Each row represents a clone (allele) that was sequenced. Dense cytosine methylation was observed in individual alleles of the L1 5' UTR in (*top*) HCT116 parental cells but not in (*bottom*) double knockout (DKO) cells lacking both *DNMT1* and *DNMT3b* methyltransferases (*brackets labeled at right*). *Blue bars*: position of PCR amplicon to quantify methylation at CpG dinucleotides in L1 5' UTR genome-wide. Percentages of all CpGs in the 5'UTR amplicon that were methylated were calculated as 63.7% in the HCT116 parental cells and 6.5% in DKO cells, respectively. Percentage methylation at four critical CpGs at L1 5' UTR positions +52, +58, +61 and +70 (*blue bar*) were 72.4% in HCT116, and 17.7% in DKO cells respectively.

Supp. Fig. S5. Lack of cytosine methylation at silenced, de novo L1 reporter insertions in cultured HeLa cells. Cytosine methylation was assessed by bisulfite sequencing at newly mobilized L1 integrants in cloned HeLa cells, both (A) in the body of the *TEM-1* beta-lactamase reporter gene (*blue arrows*; bisulfite primers DES709 x DES519), and (B) in the SV40 promoter that drives the reporter (bisulfite primers DES711 x DES519). Each circle represents a CpG

dinucleotide. A solid circle represents a methylated dinucleotide, while an open circle represents an unmethylated one. Each row represents a clone (allele) that was sequenced.

Supp. Fig. S6. **Variable L1 reporter expression in cultured cancer cells is associated with changes in histone acetylation.** HeLa cells harboring de novo L1 reporter integrants were assayed for reporter beta-lactamase expression by incubating them with the fluorescent substrate, CCF2-AM. *Left:* before and *right:* after incubation for 24 h with various histone deacetylase inhibitors including: (A) 1 uM scriptaid and (B) 5 mM nicotinamide respectively.

Supp. Fig. S7. **De-repression and re-repression of L1 reporter gene upon treatment and removal of HDAC inhibitor.** Variegated HeLa cells (A) were treated with 100 nM Trichostatin A for 24 hrs, after which they were stained with CCF2-AM and visualized (B), when the population was entirely blue. Subsequently, after washing out TsA, the cells were visualized after an additional 8 hrs (C), 26 hrs (D) and 56 hrs (E) of culture. Upon removal of the histone deacetylase inhibitor, L1 reporter variegation gradually was re-established in the cell population (compare panels A, D and E).

## **SUPPLEMENTAL TABLES**

Supp. Table T1. **Oligonucleotides used in this study.**

Supp. Table T2. **De novo L1 integrant features.** Human L1.3, marked by TEM1 reporter gene in pDES46 (Fig. 1), was mobilized in HeLa cells. Several cellular subclones were isolated by limiting dilution. Individual integrants were recovered using the L1 insertion dimorphism display method [44] which involves inverse PCR. Listed here are the chromosomal band and coordinates (hg17) of each insertion, the restriction enzyme used for their recovery, and

genomic features at the site of integration. Not listed are the sites of additional new L1 integrants (cf. Supp. Fig. S2).

**Supp. Table T3. Expression status of predicted SAGE tags from consensus human L1 template sequence in sense and antisense orientation.** SAGE tags mapping to L1.3, identified in HCT116 parental (WT) and double knockout (DKO cell) libraries. *Column headers:* *Tags*, predicted L1 sequence in tag; *WT*, normalized tag count (tags per million) in HCT116 library; *DKO*, normalized tag count (tags per million) in library DKO2L prepared from DKO cells; *Ratio DKO/WT*: ratio of tag counts expressed in DKO vs. WT; *AvgLong*, cumulative average count of the tags in all long-SAGE libraries on NCBI portal; *nt. position*: nucleotide position of the tags mapped to the L1.3 sequence in sense orientation, NF: tag not found. To compare the expression of tags in both libraries (DKO/WT ratios) in cases where tags were detected in one library but not the other, we substituted a normalized “half tag” expression value (normalized per million), i.e. 4.3 or 4.9 tags per million.



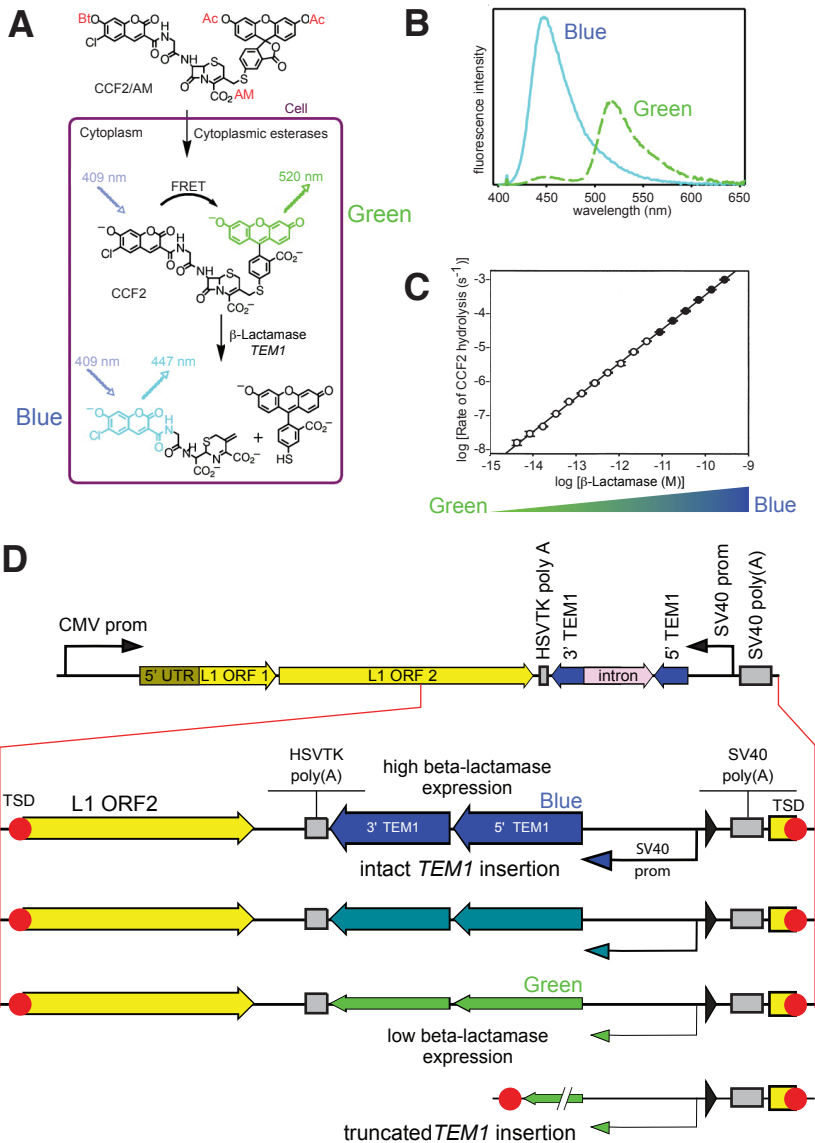

**A**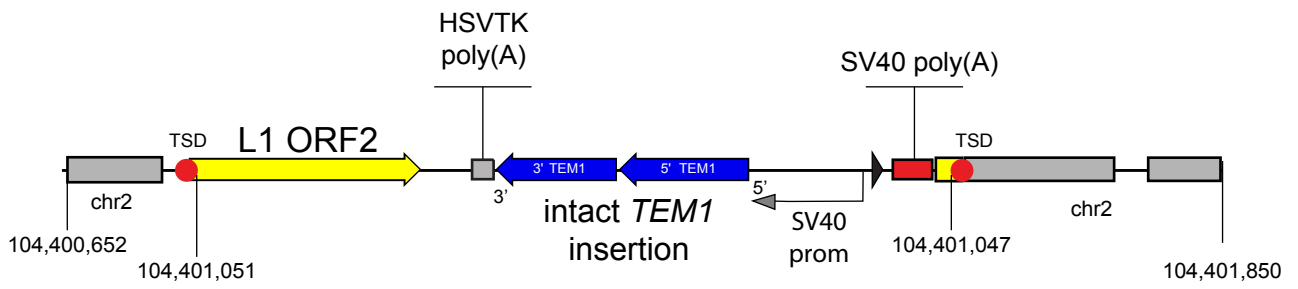**B**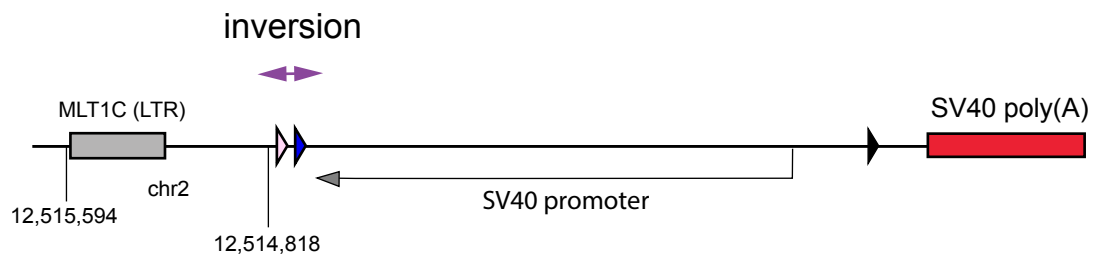**C**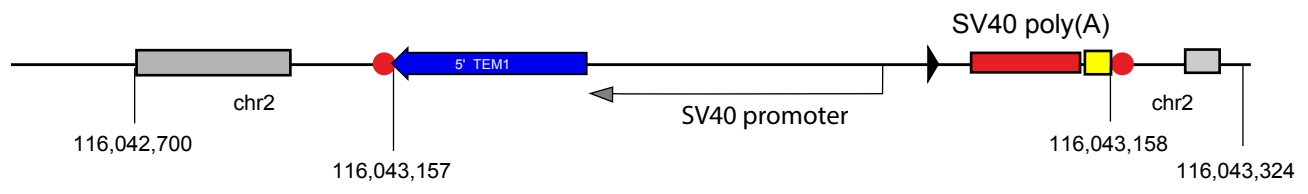

**A**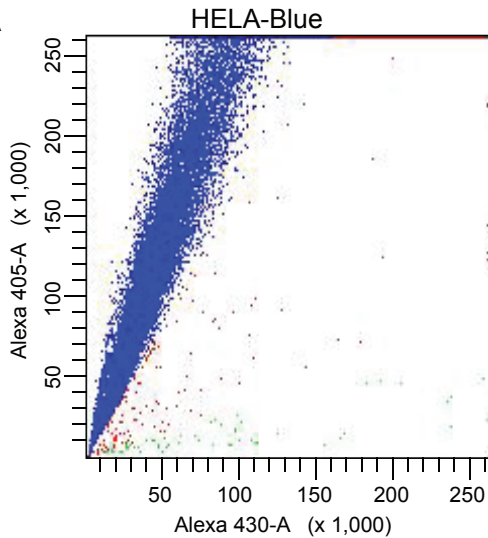**B**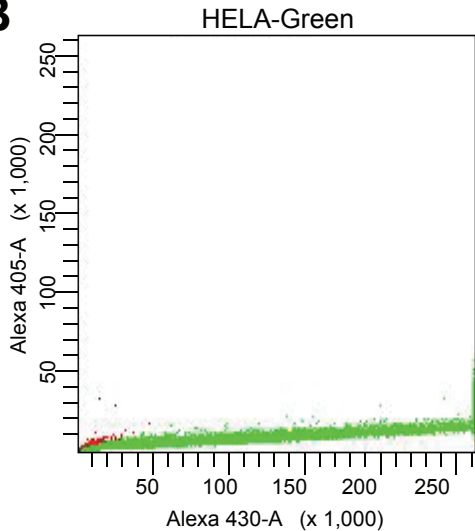

Supp. Fig. S3

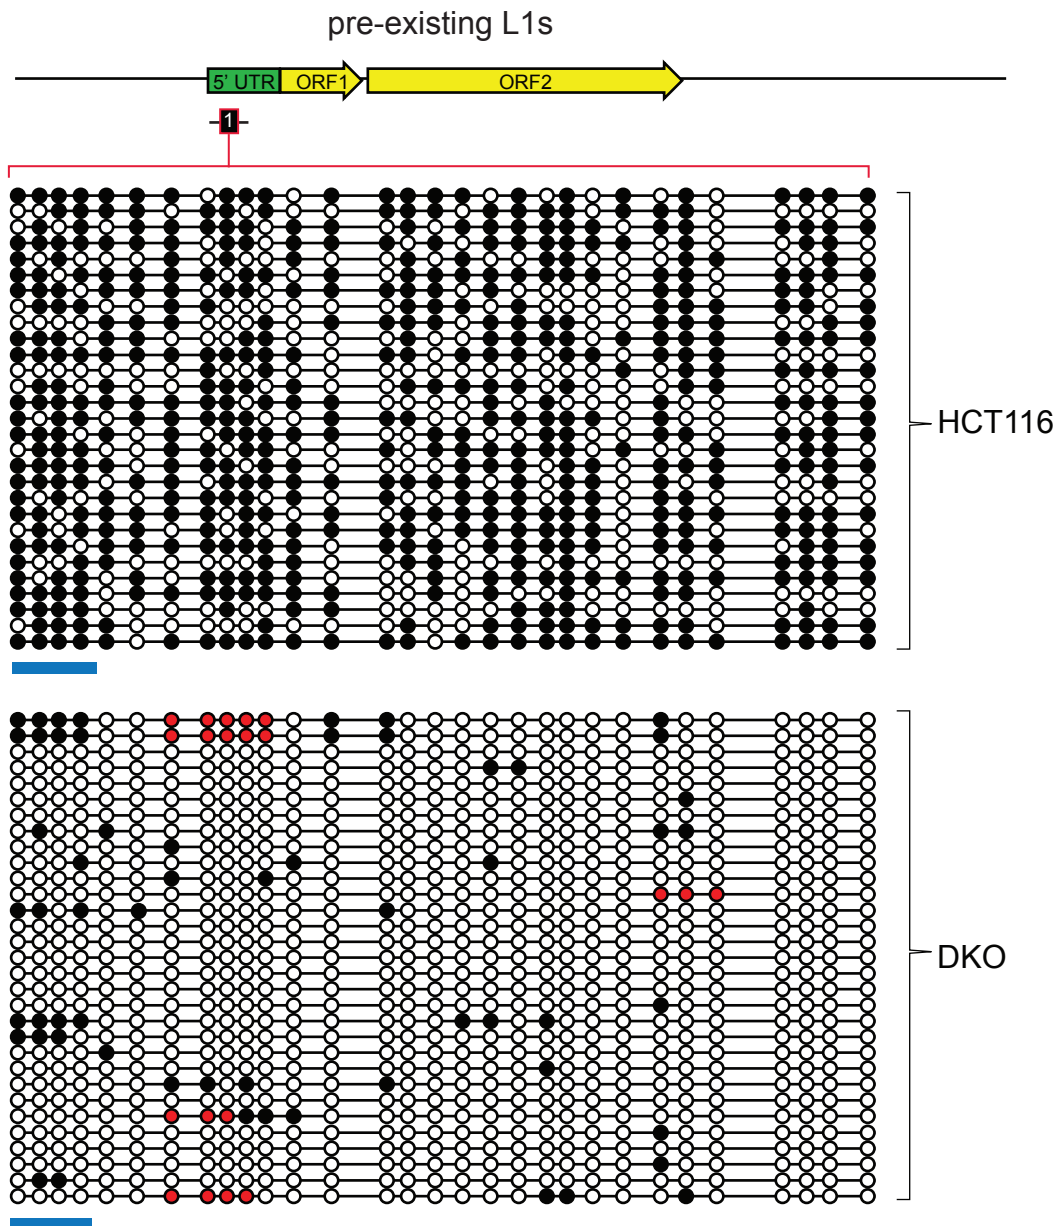

Supp. Fig. S4

**A**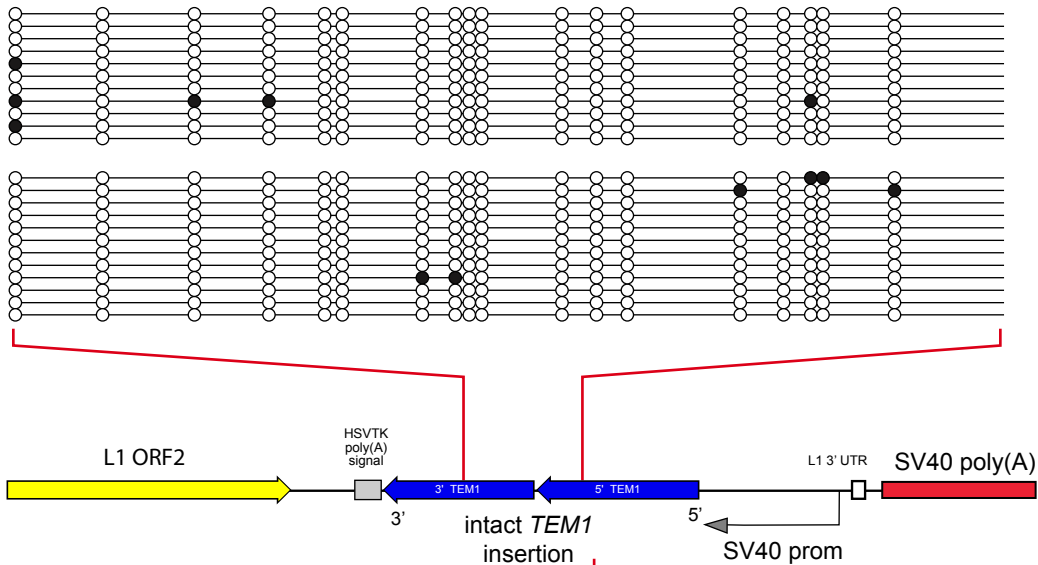**B**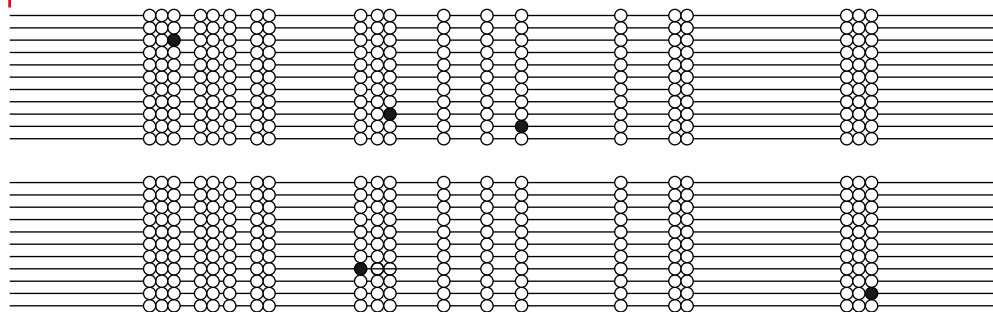

before

after

**A**

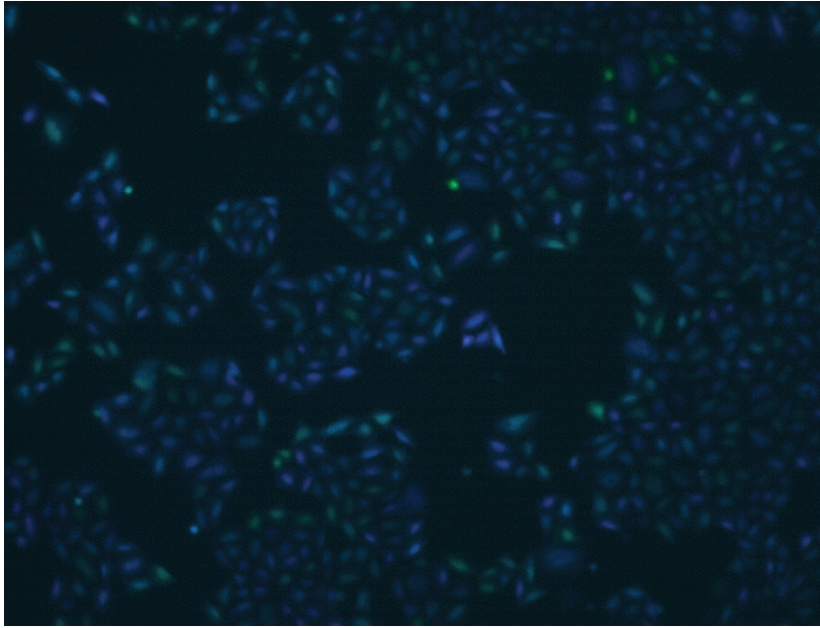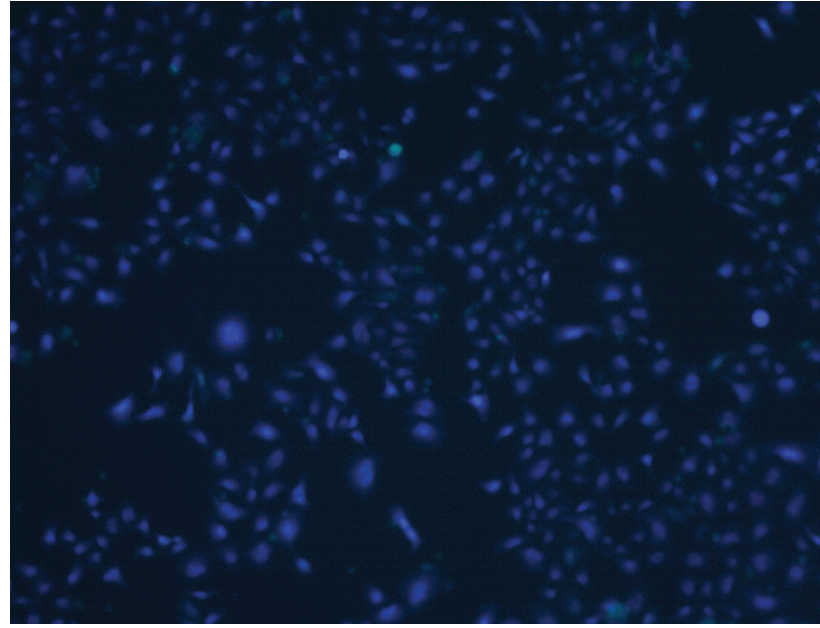

1  $\mu$ M Scriptaid

**B**

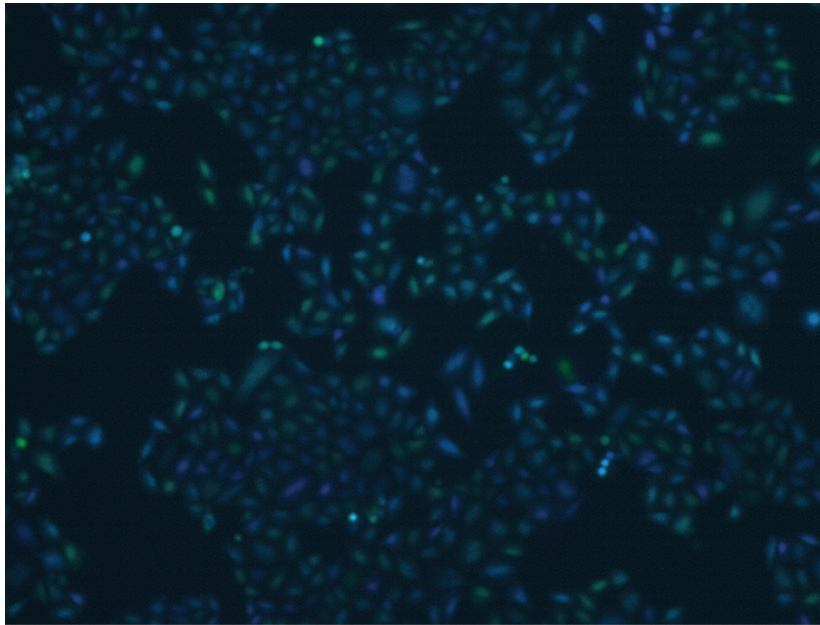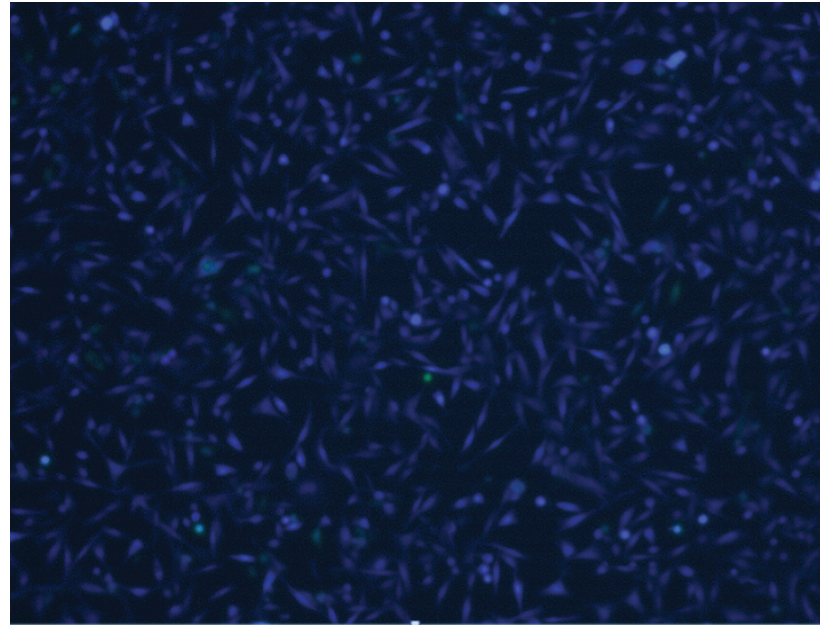

5 mM nicotinamide



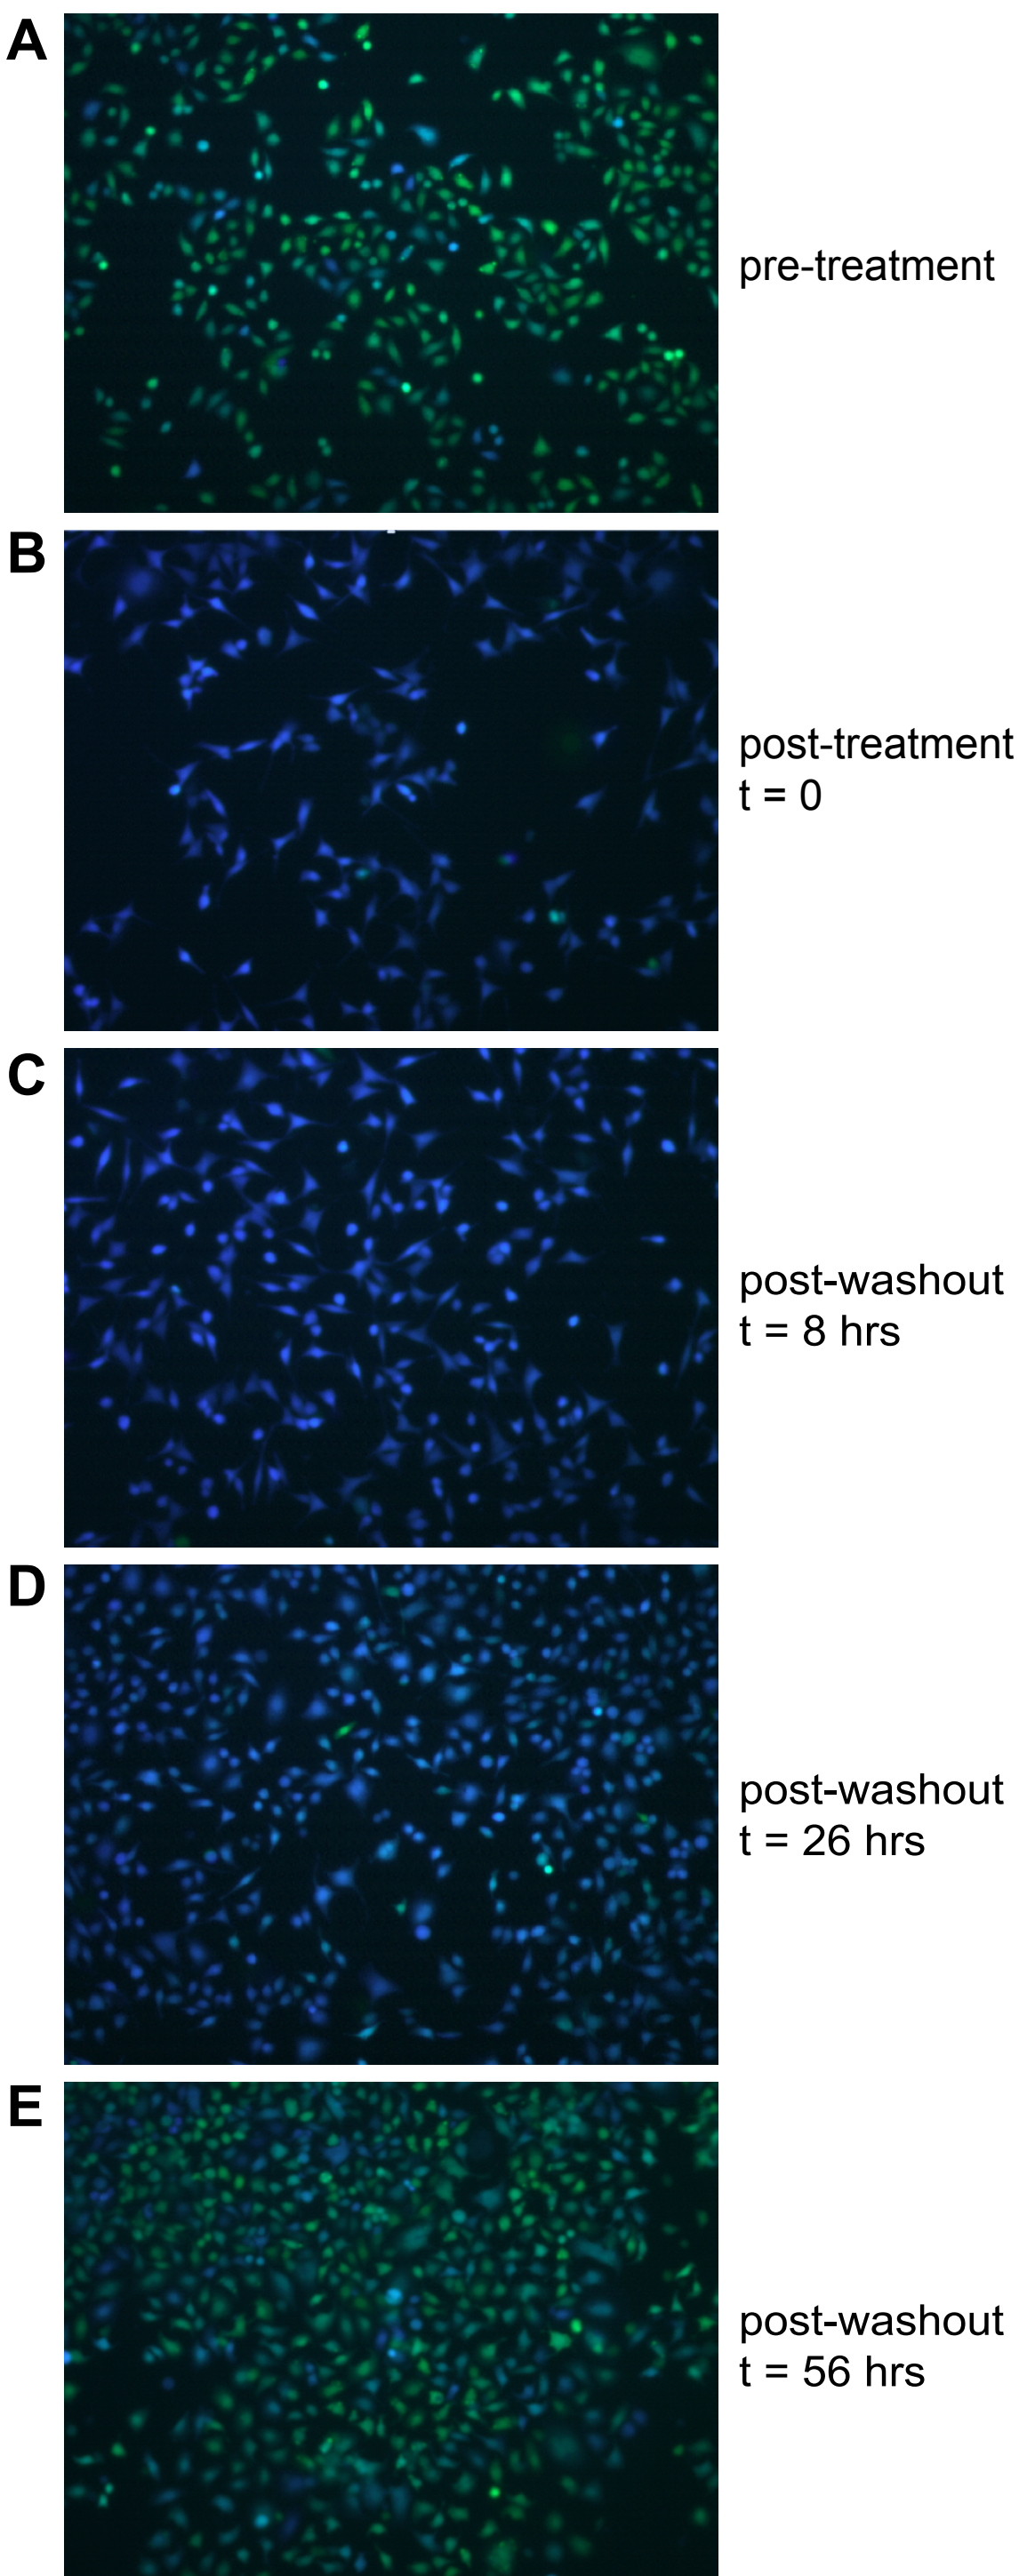

| Supp. Table T1 | Oligonucleotide primers used in this study. |                                                                                                                               |
|----------------|---------------------------------------------|-------------------------------------------------------------------------------------------------------------------------------|
| DES209         | 5'-AGCTATTCCAGAAGTAGTG-3'                   | sense, within SV40 promoter in pCEP4, pDES46 backbone                                                                         |
| DES459         | 5'-CCCCCAAAAATAAAACCTACAAAAAC-3'            | Antisense L1 5' UTR bisulfite sequencing primer, anneals at 556-531 of L1.3                                                   |
| DES460         | 5'-GTYGAATAGGAATAGTTTYGGTTTATAGTTTTTAG-3'   | Sense L1 5' UTR bisulfite sequencing primer, anneals at 18-45 of L1.3                                                         |
| DES512         | 5'-AAGAAAGGtTtTGATtTtTAGAAGtTGGGTAt-3'      | HCT116 cell line 7H2, bisulfite sense, in genomic flanking sequence ~ 80 bp upstream of L1 5' UTR junction including CMV prom |
| DES515         | 5'-GGtAAGtAGGtATyGttATGGGTt-3'              | bisulfite sense, within <i>Neo</i> gene                                                                                       |
| DES519         | 5'-CATTCTCCaCCCCATaaCTaAC-3'                | bisulfite antisense, ~150 bp downstream of <i>Neo</i> in SV40 early promoter                                                  |
| DES524         | 5'-TCCTATCATCTCACCTTACTCC-3'                | bisulfite antisense within <i>Neo</i> , at nt 6542-6521 of pDES89/spliced L1                                                  |
| DES530         | 5'-CAAATAAAACAATACCTCRCCCTA-3'              | HCT116 cell line 7H2, bisulfite antisense L1 5' UTR                                                                           |
| DES657         | 5'-AATGCTTAATCAGTGAGGCACCTAT-3'             | beta lactamase sense                                                                                                          |
| DES658         | 5'-CAGAAACGCTGGTGAAAGTAAAA-3'               | beta lactamase antisense                                                                                                      |
| DES682         | 5'-GGGACTTTCCACACCCTAA-3'                   | antisense, within SV40prom promoter in pCEP4, pDES46 backbone                                                                 |
| DES709         | 5'-yGtAGAAGTGGTtTGtAAtTTTATt-3'             | bisulfite 3' <i>TEM1</i> in pDES46 – sense strand                                                                             |
| DES711         | 5'-GATGtTTTTtTGtGAtGGTGAGTAtTtAA-3'         | bisulfite 5' <i>TEM1</i> in pDES46 sense strand                                                                               |
| DES713         | 5'-CAaTaCTaCCATAACCATaAaTaATAAACT-3'        | antisense <i>TEM1</i> primer in 5' end                                                                                        |
| DES2016        | GAAGTATTTGAAGAAGTGTAGTATTAGTTTG             | Bisulf. mod. sense primer located in smL1 ORF2                                                                                |



|         |                                                     |                                                                                 |
|---------|-----------------------------------------------------|---------------------------------------------------------------------------------|
| DES2018 | CTTCTAAAAAAAAACATAATATCCACACTTC                     | Bisulfite modified AS primer located downstream of smL1 ORF2                    |
| DES2219 | 5'-GTTGGGGTTTTTGTGGTAGGG-3'                         | sense, bisulfite seq in smL1 EGFP reporter                                      |
| DES2221 | 5'-TAAATTAACAACATACCTTAC<br>AAAAAAAAAAAAAAAAACAC-3' | antisense, bisulfite seq in smL1 RSV promoter                                   |
| DES3171 | 5'-bio-TCCTCGCCCTTGCTCACCAT3'                       | LAM-PCR linear amplification for integrant recovery in ES cells                 |
| DES3172 | 5'-ATGTGGTGAATGGTCAAATGGCG-3'                       | nested PCR for integrant recovery in ES cells                                   |
| DES3173 | 5'-ACCCGTCTGTTGCCTTCCTAA-3'                         | nested PCR for integrant recovery in ES cells                                   |
| DES3174 | 5'-bio-TTCCCTCTGCCAAAAATTATGGG-3'                   | LAM-PCR linear amplification for integrant recovery in ES cells                 |
| DES3175 | 5'-ATGAAGCCCCTTGAGCATCTG-3'                         | nested PCR for integrant recovery in ES cells                                   |
| DES3176 | 5'-CTTGAGCATCTGACTTCTGGC-3'                         | nested PCR for integrant recovery in ES cells                                   |
| DES3177 | 5'-AGGTAACGAGTCAGACCACCGACT<br>CGTGGAGGTTAGACTG-3'  | HaeIII adapter and Sau3AI adapter in LAM-PCR for integrant recovery in ES cells |
| DES3178 | 5'-CAGTCTAACCTCCAC-3'                               | HaeIII adapter in LAM-PCR                                                       |
| DES3179 | 5'-GATCCAGTCTAACCTCCAC-3'                           | LAM-PCR adapter for integrant recovery in ES cells                              |
| DES3181 | 5'- AGGTAACGAGTCAGACCACC -3'                        | Sau3AI adapter in LAM-PCR for integrant                                         |

|         |                                               |                                                                         |
|---------|-----------------------------------------------|-------------------------------------------------------------------------|
|         |                                               | recovery in ES cells                                                    |
| DES3182 | 5' -GACTCGTGGAGGTTAGACTG-3'                   | nested PCR for integrant recovery in ES cells                           |
| DES3298 | 5'-GTAGTTGTTGAATATTTTATTT<br>TTTGGTTAGAATG-3' | truncated GFPuv / RFP promoter insertion in 1B6-A08 ES cell clone       |
| DES3299 | 5'-CCCAACTTTCTTATACAAAAT<br>AATCCCC-3'        | truncated GFPuv / RFP promoter insertion in 1B6-A08 ES cell clone       |
| DES3301 | 5'-CACCTCRTAACCACCTTCAA-3'                    | within GFPuv (not crossing splice site) in 1B6-A07 ES cell clone        |
| DES3314 | 5'-GTGGTTGTTGTAGTTGTATTTT<br>AGTTTGTG-3'      | within GFPuv (not crossing splice site) in 1B6-A07 ES cell clone        |
| DES3321 | 5'-GTTGGGGTTTTTGTAGGG-3'                      | crosses GFPuv-AI splice junction in 1B06/B02, 1C6 and 2D4 ES cell clone |
| DES3322 | 5'-AACATCCTAAAACACAACTA<br>AAATACAAC-3'       | crosses GFPuv-AI splice junction in 1B06/B02, 1C6 and 2D4 ES cell clone |

| Chromosome locus<br>(strand orientation)                           | Coordinates<br>(hg17)                  | Enzyme<br>used for<br>recovery | Genomic context                                                                   | Other          |
|--------------------------------------------------------------------|----------------------------------------|--------------------------------|-----------------------------------------------------------------------------------|----------------|
| 1q31.2 (-)                                                         | 189,998,816                            | XbaI                           | LINE L1ME2                                                                        |                |
| 2p24.3 (-)                                                         | 12,515,594                             | XbaI                           | Between LTR1B and MLT1C                                                           | Supp. Fig. S1B |
| 2q12.1 (+)                                                         | 104,401,046                            | BclI                           | Between AluSc and LTR33                                                           | Supp. Fig. S1A |
| 2q14.1 (+)                                                         | 116,043,157                            | EcoRI                          | 5 <sup>th</sup> intron of DPP10 (dipeptidyl<br>peptidase)                         | Supp. Fig. S1C |
| 3q13.31 (+)                                                        | 118,798,663                            | XbaI                           | Region 20bp upstream of GA<br>repeat                                              |                |
| 6q22.31 (+)                                                        | 121,035,080                            | XbaI                           | Region 55bp upstream of AT<br>repeat                                              |                |
| 10q21.1                                                            |                                        | Sau3AI                         | Near L1MCA transposon                                                             |                |
| t(11;13) putative<br>translocation<br>11p15.4 (+);<br>13q21.32 (-) | 11:<br>5,231,999;<br>13:<br>65,685,917 | XbaI                           | chr11: intron of gamma globin<br>gene HBG2<br>chr13: 150bp downstream of<br>L1PB4 |                |
| 17q24.1 (+)                                                        | 60,690,241                             | EcoRI                          | SINE element MIRb                                                                 |                |

Supp. Table T2.

Supp. Table S3 – SAGE tags mapping to L1.3, identified in HCT116 parental (WT) and double knockout (DKO cell) libraries.

**Sense orientation**

| Tag                | WT   | DKO   | DKO/WT | AvgLong | L1 Position |
|--------------------|------|-------|--------|---------|-------------|
| GAAAGGAACAACCGGTA  | NF   | NF    | ---    | 2.43    | 1879        |
| CCAAAATGTAAAGACCA  | 4.3  | 9.8   | 2.2    | 1.62    | 1916        |
| GAAACTGAACAACCTGC  | 4.3  | 49.08 | 11.2   | 29.7    | 2739        |
| GAGGAACTGGTACCATT  | NF   | NF    | ---    | 0.27    | 3445        |
| ATCAAGTGGGCTTCATC  | NF   | NF    | ---    | 1.62    | 3674        |
| ATTATCTCAATAGATGC  | NF   | NF    | ---    | 0.54    | 3775        |
| CTAAAACTCTCAATAA   | NF   | NF    | ---    | 0.54    | 3829        |
| ATTGTATATCTAGAAAA  | NF   | NF    | ---    | 0.27    | 4102        |
| GGTGAACTCCCATTTCGT | NF   | NF    | ---    | 0       | 4252        |
| GGTAGGAAGAATCAATA  | NF   | NF    | ---    | 0.54    | 4407        |
| GTACTGGTACCAAAAACA | NF   | NF    | ---    | 5.6     | 4653        |
| TCCAAAACACCAAAAAGC | NF   | NF    | ---    | 1.35    | 4975        |
| GGAGAAAATTTTCGCAA  | NF   | NF    | ---    | 0       | 5097        |
| AACAGACACTTCTCAA   | NF   | NF    | ---    | 1.35    | 5218        |
| AAGAAATGCTCATCATC  | NF   | NF    | ---    | 0.27    | 5266        |
| CTGCTATAAAGACACAT  | NF   | NF    | ---    | 0       | 5550        |
| CACACGTATGTTTATTG  | NF   | NF    | ---    | 2.43    | 5568        |
| GAATACTATGCAGCCAT  | NF   | NF    | ---    | 0.54    | 5677        |
| GATGAAATTGGAAACCA  | NF   | NF    | ---    | 0.54    | 5730        |
| GACACAGGAAGGGGAAT  | 4.3  | 9.8   | 2.2    | 1.08    | 5834        |
| TATACATATGTAECTAA  | NF   | NF    | NA     | 5.13    | 5964        |
| TACCCTAAAACCTTAGAG | 26.2 | 78.5  | 2.9    | 76.41   | 6000        |

---

**Antisense orientation**

| Tag               | WT  | DKO | DKO/WT | AvgLong | L1 Position |
|-------------------|-----|-----|--------|---------|-------------|
| TGCACATTGTGCAGGTT | NF  | NF  | ---    | 0.81    | 65          |
| TGCCATGCTGGTGCCT  | NF  | NF  | ---    | 0       | 101         |
| CTGGTGCCTGCACCCA  | NF  | NF  | ---    | 11.8    | 108         |
| TGATCTCATTGTTCAAT | NF  | NF  | ---    | 0.54    | 231         |
| TCCCTACAAAGGATATG | NF  | NF  | ---    | 0.27    | 335         |
| GTGTATATGTGCCACAT | 4.3 | 9.8 | 2.2    | 4.3     | 388         |
| TGTCTTTATAGCAGCAT | NF  | NF  | ---    | 0       | 497         |
| ATTTATACTCATTTGGG | NF  | NF  | ---    | 0       | 515         |
| TGTTTTTTGGCTGCATA | NF  | NF  | ---    | 0.81    | 799         |
| TCCTTCGCCCACTTTTT | NF  | NF  | ---    | 2.7     | 847         |
| TTGTAGGTTGCCTGTTC | NF  | NF  | ---    | 0       | 968         |
| AAGTCCTTGCCCACGCC | NF  | NF  | ---    | 0       | 1090        |
| CTGTTTTGGTTACTGTA | NF  | NF  | ---    | 3.2     | 1412        |
| GAATGTTCTTCAGCATG | NF  | NF  | ---    | 0       | 1660        |
| GAATGTTCTTCCATTTG | NF  | NF  | ---    | 0.27    | 1677        |
| ATTTGGCTCTGTGTTG  | NF  | NF  | ---    | 0.81    | 1826        |
| TCGTCTGCAAACAGGGA | NF  | NF  | ---    | 0.54    | 1976        |
| AAGGGTTGTTGAATTTT | NF  | NF  | ---    | 0       | 2249        |
| TGGTTTTTGTCTTTGGC | NF  | NF  | ---    | 0.27    | 2303        |
| GTGGATAAGCTTTTTGA | NF  | NF  | ---    | 2.7     | 2404        |
| TACCTCTGGTAGAATTC | NF  | NF  | ---    | 0       | 2633        |

|                   |     |     |     |      |      |
|-------------------|-----|-----|-----|------|------|
| TAGTTGAGCGGCTTTGA | NF  | NF  | --- | 0.27 | 3339 |
| ATTTTGCAGCGGCTGGT | NF  | NF  | --- | 0.27 | 4162 |
| TTTAGCGCTTCCTTCAG | 8.7 | 4.9 | 0.5 | 2.16 | 4199 |
